# Supplementary material for: The acceptability of cervical electrical impedance spectroscopy within a multi-modal preterm birth screening package: a mixed methods study
Source: BMC Pregnancy Childbirth. 2022 Dec 22;22:959. doi: 10.1186/s12884-022-05202-z (PMC9783720; doi:10.1186/s12884-022-05202-z)
Supplement: Supplementary file 4 — Additional file 4. [file 12884_2022_5202_MOESM4_ESM.xlsx]

## Sheet: Anonymised acceptability questi
Participant	Study_group	Pre__visit__STAI_calm	Pre__visit__STAI_tense	Pre__visit__STAI_upset	Pre__visit__STAI_relaxed	Pre__visit__STAI_content	Pre__visit__STAI_worried	Previsit__STAI__sum	Previsit__STAI__score	post__visit__STAI_calm	post__visit__STAI_tense	post__visit__STAI_upset	post__visit__STAI_relaxed	post__visit__STAI_content	post__visit__STAI_worried	Post__visit__STAI__sum	Post__visit__STAI__score	STAI__score__difference	Post__STAI__comments	SF__Mcgill__VAS__pain__score	SF__Mcgill__PPI	SF__Mcgill_throbbing	SF__Mcgill_shooting	SF__Mcgill_stabbing	SF__Mcgill_sharp	SF__Mcgill_cramping	SF__Mcgill_gnawing	SF__Mcgill_hot_burning	SF__Mcgill_aching	SF__Mcgill_heavy	SF__Mcgill_tender	SF__Mcgill_splitting	SF__Mcgill_tiring_exhausting	SF__Mcgill_sickening	SF__Mcgill_fearful	SF__Mcgill_punishing_cruel	Threatening__design__of__device	Procedure__acceptability__rating	Free__text__comment__acceptability	Changes__required	Changes__required__comments	acceptable_use__in_AN_care	Other__free__text__comment	Previsit_STAI_greater_or_equal_39	Postvisit_STAI_greater_or_equal_39
1	HR	1	1	1	2	1	1	7	23.33	1	1	1	1	1	1	6	20	-3.33	Vicki played a significant role in my lack of anxiety and worry	0.25	1	0	0	0	0	0	1	0	0	1	1	0	0	0	0	0	0	0		No change needed		yes	The procedure was clearly explained through Vicki and the information sheets so I felt I was prepared and knew what would be done. The few concerns I did have, Vicki discussed with me in detail so I felt assured when the time for the procedure came.	0	0
2	HR	2	3	3	2	2	3	15	50	2	3	3	2	2	3	15	50	0		0.75	1	0	0	0	0	0	0	0	1	0	1	0	0	0	1	0	0	1		No change needed		yes		1	1
3	HR	3	3	3	3	3	3	18	60	2	1	1	3	3	2	12	40	-20		1	2	0	0	0	1	0	0	0	0	0	1	0	0	0	1	0	1	2	Not really unacceptable but took additional time due to wifi connection. This was likely to be atypical and not experienced by most participants	No change needed	Don't think that the procedure could be altered significantly to obtain the type of results so the current tests are appropriate and need no change. Unless a completely different set of tests was the result of study and needed analysis then these current set of procedures couldn't be altered much	yes	As discussed at previous appointments, a raised anxiety occurred prior to attending as always a worry about finding changes. However after each appointment have left feeling reassured even if small changes have been observed or in my case are enough to prompt a surgical procedure. Without the consistency and regularity of the appointments these may have gone undetected and for that I am grateful …	1	1
4	HR	2	2	1	2	1	2	10	33.33	1	1	1	2	1	1	7	23.33	-10	The tests have really helped to reduce my anxiety levels and given me reassurance. Dr Stern has been excellent in explaining process and development.	0.5	0	0	0	0	0	0	0	0	0	1	0	0	0	0	0	0	3	0		No change needed	No change needed. Explained that I would feel a little pressure initially a feel a strange sensation with new test which I would describe as pulsation pressure for a few seconds.	yes		0	0
5	HR	1	1	1	1	1	1	6	20	1	1	1	1	1	1	6	20	0		0	0	0	0	0	0	0	0	0	0	0	0	0	0	0	0	0	0	0		No change needed		yes		0	0
6	HR	2	3	1	2	2	1	11	36.67	1	1	1	1	2	1	7	23.33	-13.33		1	1	0	0	0	1	0	0	0	0	0	0	0	0	0	0	0	5	0			Procedure was fine	yes		0	0
7	HR	2	1	1	2	2	1	9	30	1	1	1	2	1	1	7	23.33	-6.67	Vicky went out of her way to make me feel reassured. She was extremely patient, efficient and happy to explain which made me feel relaxed.	1	1	0	0	0	0	0	0	1	1	0	0	0	0	0	0	0	5	0		No change needed		yes		0	0
8	HR	1	1	1	1	1	1	6	20	1	1	1	1	1	1	6	20	0		0	0	0	0	0	0	0	0	0	0	0	0	0	0	0	0	0	0	0		No change needed		yes		0	0
9	HR	3	3	1	3	2	2	14	46.6	1	1	1	2	2	2	9	30	-17		1	0	0	0	0	0	0	0	0	0	0	1	0	0	0	0	0	0	0		No change needed		yes	Only for those with previous premature birth	1	0
10	HR	1	1	1	2	2	1	8	26.67	1	1	1	1	1	1	6	20	-6.67		1	1	0	0	0	0	0	0	0	1	1	0	0	0	0	0	0	1	0		No change needed		yes	Yes- for women with previous preterm birth	0	0
11	HR	2	1	1	2	1	1	8	26.67	1	1	1	1	1	1	6	20	-7		2	1	0	0	0	0	0	0	0	0	1	0	0	0	0	0	0	2	0		No change needed		yes		0	0
12	HR	1	1	3	1	3	2	10	33	1	1	2	1	3	1	9	30	-3		3	2	1	0	0	1	0	0	0	0	0	1	0	0	0	0	0	2	3		No change needed		yes		0	0
13	HR	1	1	1	1	1	1	6	20	1	1	1	1	1	1	6	20	0		1	1	0	0	0	0	0	0	0	1	0	0	0	0	0	0	0	0	0		No change needed		yes		0	0
14	HR	1	1	1	1	1	1	6	20	1	1	1	1	1	1	6	20	0		0	0	0	0	0	0	0	0	0	0	0	0	0	0	0	0	0	0	0		No change needed		yes		0	0
15	HR	3	3	1	3	2	3	15	50	2	2	1	3	2	2	12	40	-10		2	1	1	0	0	0	0	0	0	1	0	0	0	0	0	0	0	1	1		No change needed		yes		1	1
16	HR	1	1	1	1	1	1	6	20	1	1	1	1	1	1	6	20	0		0	0	0	0	0	0	0	0	0	0	0	0	0	0	0	0	0	0	0		No change needed		yes		0	0
17	HR	3	3	2	3	3	2	16	53.33	3	2	1	3	3	1	13	43.33	-10		2	1	0	1	1	0	0	0	0	0	0	0	0	0	0	0	0	0	1		No change needed		yes		1	1
18	HR	2	3	1	2	2	3	13	43.33	2	3	1	2	2	3	13	43.33	0		2	1	0	0	0	0	0	0	0	0	0	0	0	0	0	0	0	1	1		No change needed		yes		1	1
19	HR	1	1	1	1	1	1	6	20	1	1	1	1	1	1	6	20	0		0	0	0	0	0	0	0	0	0	0	0	0	0	0	0	0	0	0	0		No change needed		yes		0	0
20	HR	3	1	1	3	2	1	11	36.67	2	1	1	3	2	1	10	33	-4		1	1	0	0	0	0	0	0	0	1	1	0	0	0	0	0	0	5	2		No change needed		yes		0	0
21	LR	1	1	1	2	2	1	8	26.67	1	1	1	2	2	1	8	26.67	0		0.5	0	0	0	0	0	0	0	0	0	0	0	0	0	0	0	0	0	0		No change needed		yes		0	0
22	LR	1	1	1	1	1	1	6	20	1	1	1	1	1	2	7	23.33	3.33	I felt very calm during examination. My only worry was that interference could cause some degree of bleeding, but it was ok after having explanation and did not have any side effects after	0.5	0	0	0	0	0	0	0	0	0	0	0	0	0	0	0	0	1	0		No change needed		yes		0	0
23	LR	3	3	1	2	3	3	15	50	2	2	1	2	2	2	11	36.67	-13.33	I felt at ease after the tests and anxiety I was experiencing was more due to going for my 20 week scan immediately after	1	1	0	0	0	1	0	0	0	0	0	0	0	0	0	0	0	1	1		No change needed		yes		1	0
24	LR	2	2	1	2	2	2	11	36.67	1	1	1	2	1	1	7	23.33	-13.33		1	0	0	0	0	0	0	0	0	1	0	0	0	0	0	0	0	0	1		No change needed		yes	Felt like a safe reassuring environment. V helpful to have the tests fully explained beforehand and during the procedure.	0	0
25	LR	1	2	1	2	2	1	9	30	1	1	1	1	2	1	7	23.33	-6.67		2	1	1	0	0	0	0	0	0	0	0	1	0	0	0	1	0	1	0		No change needed		yes		0	0
26	LR	2	2	1	2	2	1	10	33.33	1	1	1	2	2	1	8	26.67	-6.67		0.5	0	0	0	0	0	0	0	0	1	0	1	0	0	0	0	0	9	1		No change needed		yes		0	0
27	LR	2	3	1	3	3	2	14	46.67	3	2	1	2	3	2	13	43.33	-3.33		3	1	0	0	0	0	1	0	0	1	1	2	0	0	0	0	0	6	5	Not sure would want to undergo it as a routine test - only if needed	No change needed		yes	Yes - if needed	1	1
28	LR	2	1	1	1	2	1	8	26.67	1	1	1	1	1	1	6	20	-6.67		0.25	0	1	0	0	1	0	0	0	0	0	0	0	0	0	0	0	0	0		No change needed		yes		0	0
29	LR	1	1	1	1	1	1	6	20	1	1	1	1	1	1	6	20	0		0.25	0	0	0	0	0	0	0	0	0	1	0	0	0	0	0	0	0	0		No change needed		yes		0	0
30	LR	2	1	1	2	2	1	9	30	1	1	1	2	1	1	7	23.33	-6.67		1.5	1	0	0	0	1	0	0	0	0	0	1	0	0	0	0	0	0	0		No change needed but ideally do without a speculum if possible		yes		0	0
31	LR	2	1	1	1	2	3	10	33	2	1	1	1	2	1	8	26.67	-6		2	1	0	0	0	0	1	0	0	1	1	0	0	0	0	0	0	2	0		No change needed		yes		0	0
32	LR	1	1	1	1	1	1	6	20	1	1	1	1	1	1	6	20	0		0	0	0	0	0	0	0	0	0	0	1	0	0	0	0	0	0	0	0		No change needed		yes		0	0
33	LR	1	1	1	1	1	1	6	20	1	1	1	1	1	1	6	20	0		1	1	0	1	0	0	0	0	0	0	1	0	0	0	0	0	0	3	1		No change needed		yes		0	0
34	LR	2	2	1	2	2	2	11	36.67	2	1	1	2	2	1	9	30	-7		2	2	1	0	0	0	1	0	0	0	0	1	0	0	0	0	0	1	1		No change needed		yes		0	0
35	LR	3	3	1	2	3	3	15	50	2	2	1	2	2	2	11	36.67	-13		3	2	0	0	0	0	2	0	0	1	0	0	0	0	0	0	0	1	4		No change needed	Would prefer without speculum	yes		1	0
36	LR	1	1	1	1	1	1	6	20	1	1	1	1	1	1	6	20	0		0	0	0	0	0	0	0	0	0	0	0	0	0	0	0	0	0	0	0		No change needed		yes		0	0
37	LR	1	1	1	1	1	1	6	20	1	1	1	1	1	1	6	20	0		1	1	0	0	0	0	0	0	0	0	1	0	0	0	0	0	0	0	0		No change needed		yes		0	0
38	LR	3	2	1	3	2	1	12	40	3	1	1	2	2	1	10	33	-7		1	1	0	0	0	0	0	0	0	1	0	0	0	0	0	0	0	1	1		No change needed		yes		1	0
39	LR	2	1	1	2	2	1	9	30	3	2	3	4	2	3	17	56.66	27		1	1	0	0	0	0	0	0	0	1	1	0	0	0	0	0	0	0	0		No change needed		yes		0	1
40	LR	1	1	1	2	2	1	8	26.67	1	1	1	1	2	1	7	23.33	-5		0	0	0	0	0	0	0	0	0	0	0	0	0	0	0	0	0	1	0		No change needed		yes		0	0
